# Supplementary material
Source: Springer Nature journal article supplement (https://www.springermedizin.de/resource/supplementary/13045_2013_326_MOESM7_ESM.pdf/9661130)

**A**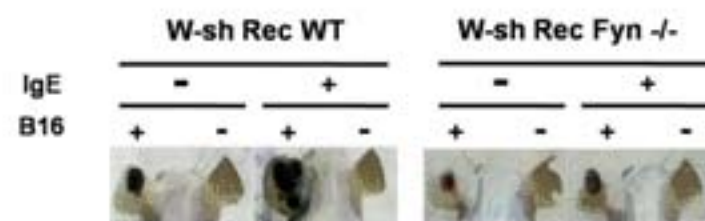**B**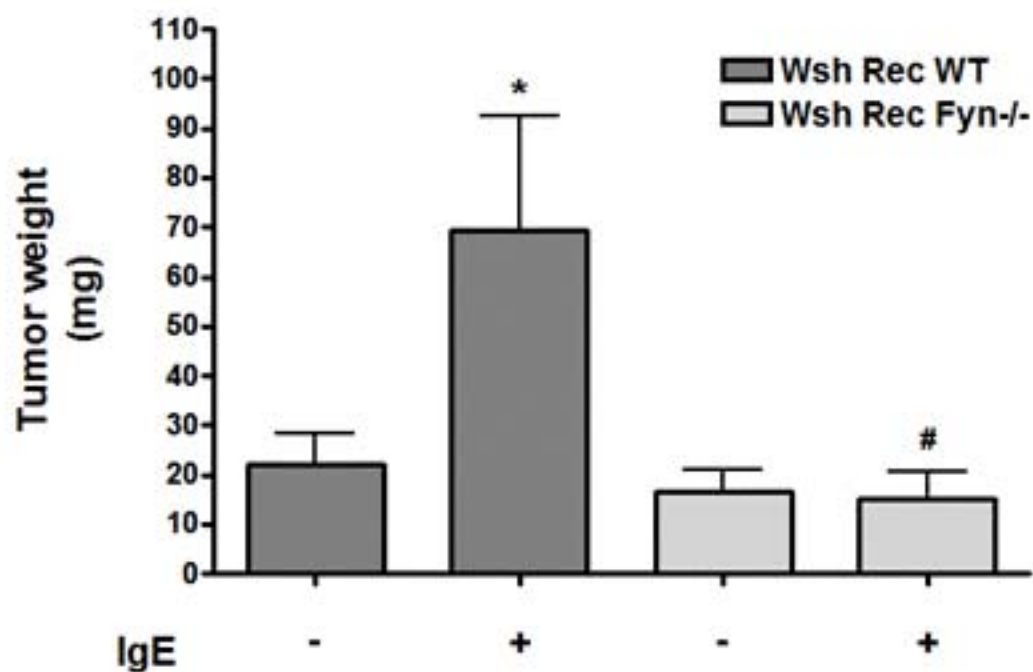**C**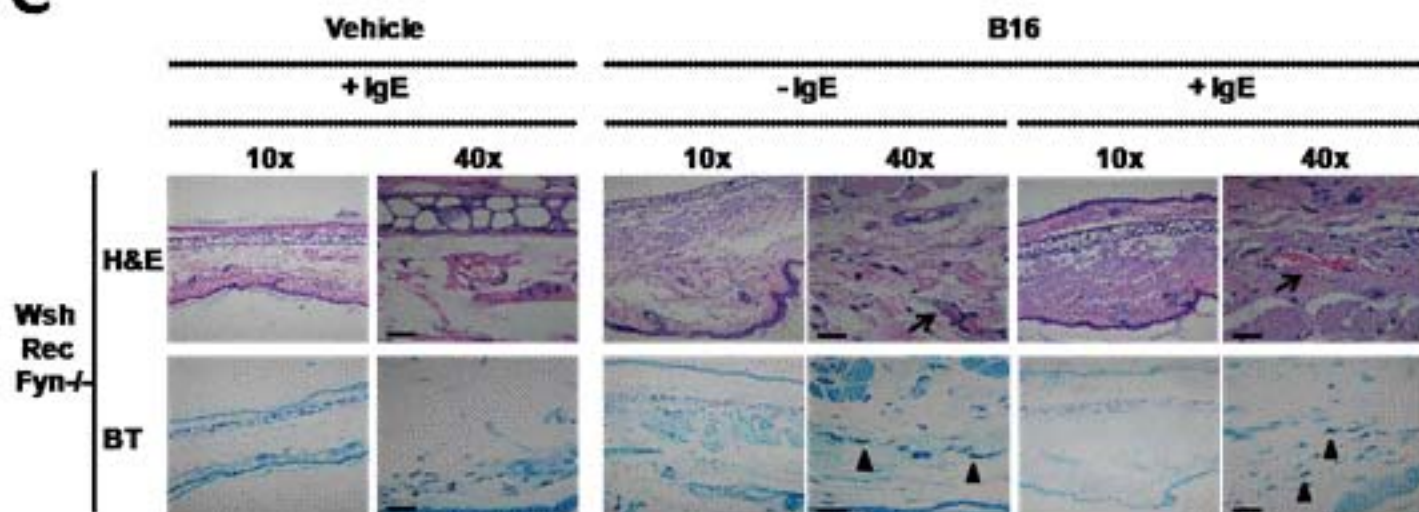**D**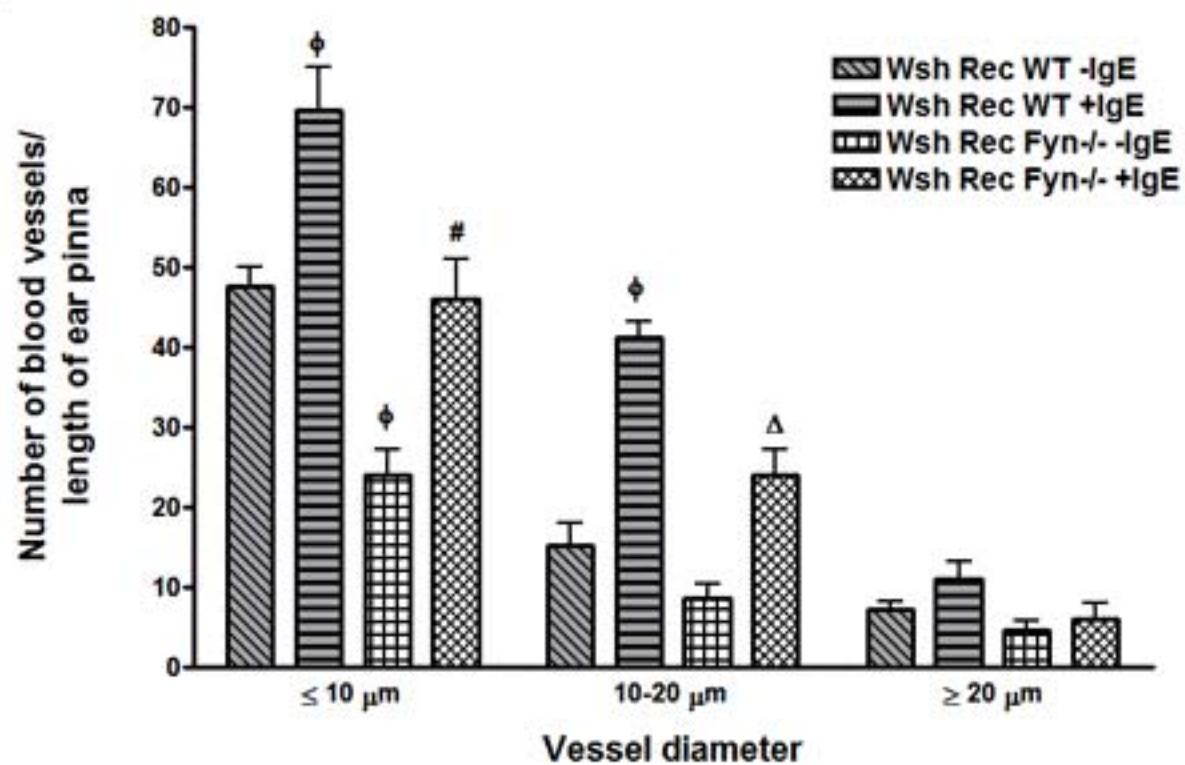

Supplement: MOESM7 [file 9661130]
